# Supplementary material for: NH3-Selective Catalytic Reduction of NOx to N2 over Ceria Supported WOx Based Catalysts: Influence of Tungsten Content
Source: MDPI journal article supplement (doi:10.3390/catal11080950), 2021-08-09
Supplement: s1 [file s1]

# NH<sub>3</sub>-selective catalytic reduction of NO<sub>x</sub> to N<sub>2</sub> over ceria supported HPW based catalysts: influence of tungsten content

Imane El Arrouji <sup>1,3</sup>, Cuirong Chen,<sup>3</sup> Jamil Toyir <sup>2</sup>, Cherif Larabi <sup>3</sup>, Kai C. Szeto <sup>3</sup>, Aimery de Mallmann <sup>3</sup>, Mostafa Taoufik <sup>3,\*</sup> and Abdallah Oulmekki <sup>1\*</sup>

<sup>1</sup> Laboratory of Processes, Materials and Environment (LPME), Faculty of Science and Technology Fez, University Sidi Mohammed Ben Abdellah, BP. 2202 Morocco; imane.elarrouji@usmba.ac.ma; abdallah.oulmekki@usmba.ac.ma

<sup>2</sup> Laboratory of Processes, Materials and Environment (LPME), University Sidi Mohammed Ben Abdellah, Faculty Polydisciplinary of Taza, B.P 1223, Taza, Morocco; jamil.toyir@usmba.ac.ma

<sup>3</sup> Université Lyon 1, Institut de Chimie Lyon, CPE Lyon CNRS, UMR 5265 C2P2, LCOMS, 43 Bd du 11 Novembre 1918, 69616 Villeurbanne Cedex, France; cherif.larabi@univ-lyon1.fr; kai-chung.szeto@univ-lyon1.fr; aimery.de-mallmann@univ-lyon1.fr; mostafa.taoufik@univ-lyon1.fr.

\* Correspondence: mostafa.taoufik@univ-lyon1.fr; abdallah.oulmekki@usmba.ac.ma

Figure S1: N<sub>2</sub> physisorption isotherms for each catalyst.

Figure S2: IR spectra of ceria and HPW.

Figure S3: Enlarged image of Ce-O symmetry at 500-700 cm<sup>-1</sup> (Raman spectra)

Figure S4: deconvolutions of Raman spectra for each catalyst in the range 300-650 cm<sup>-1</sup>.

Table S1. Oxygen vacancies values of HPW/CeO<sub>2</sub> (2, 4.5, 9, 16 and 40 wt% W) catalysts.

Figure S5. deconvolutions of Raman spectra for each catalyst in the range 800-1050 cm<sup>-1</sup>,

Figure S6. NO<sub>x</sub> conversion, over HPW as a function of temperature. Feed composition: 300 ppm NO, 350 ppm NH<sub>3</sub>, 5 vol. % H<sub>2</sub>O and 10 vol. % O<sub>2</sub> in He.

Figure S7: Determination the acidity of 2%HPW/CeO<sub>2</sub> by NH<sub>3</sub> desorption.

Figure S8: NO<sub>x</sub> conversion, N<sub>2</sub> selectivity over 2%HPW/CeO<sub>2</sub> as a function of temperature during several cycles. Feed composition: 300 ppm NO, 350 ppm NH<sub>3</sub>, 5 vol. % H<sub>2</sub>O and 10 vol. % O<sub>2</sub> in He.

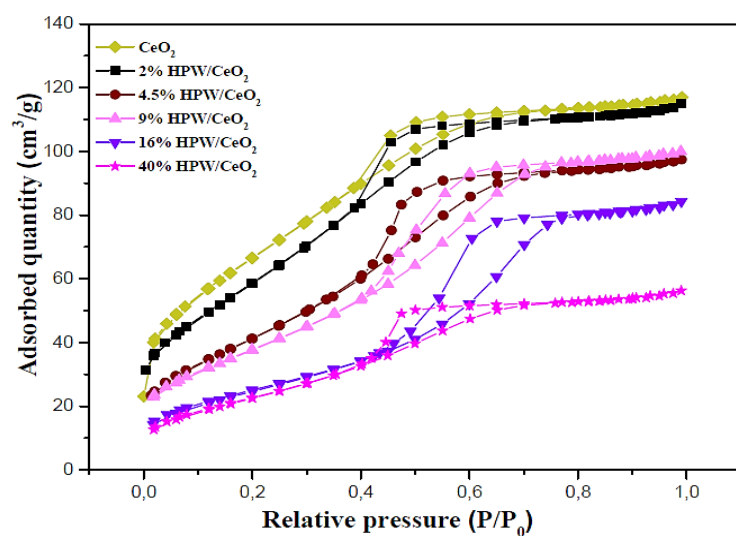

Figure S1. N<sub>2</sub> physisorption isotherms for each catalyst

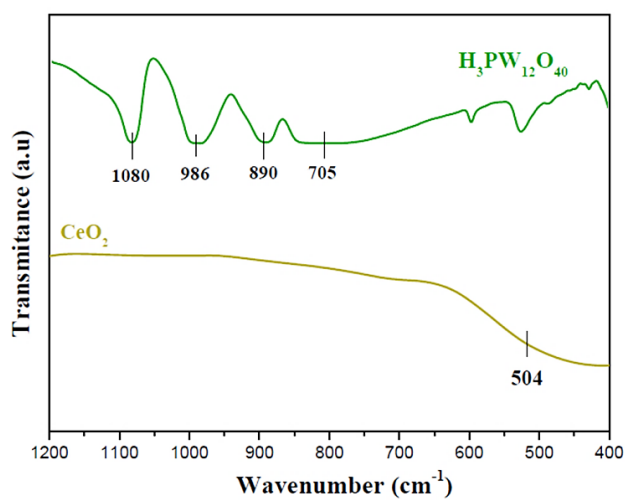

Figure S2. IR-FT spectra of CeO<sub>2</sub> and HPW

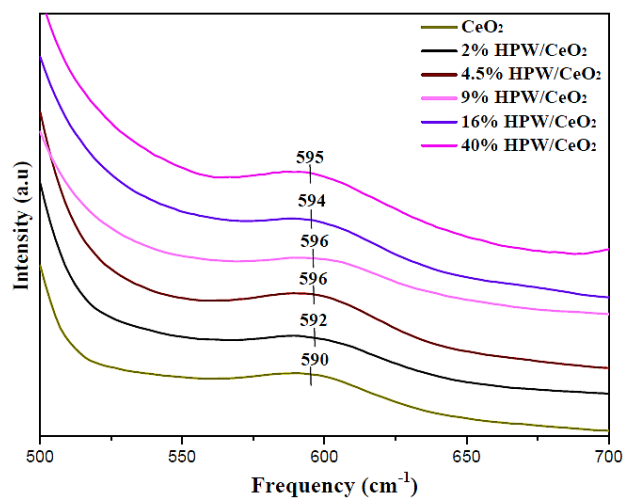

**Figure S3.** Enlarged image of Ce-O symmetry at 500-700  $\text{cm}^{-1}$  (Raman spectra)

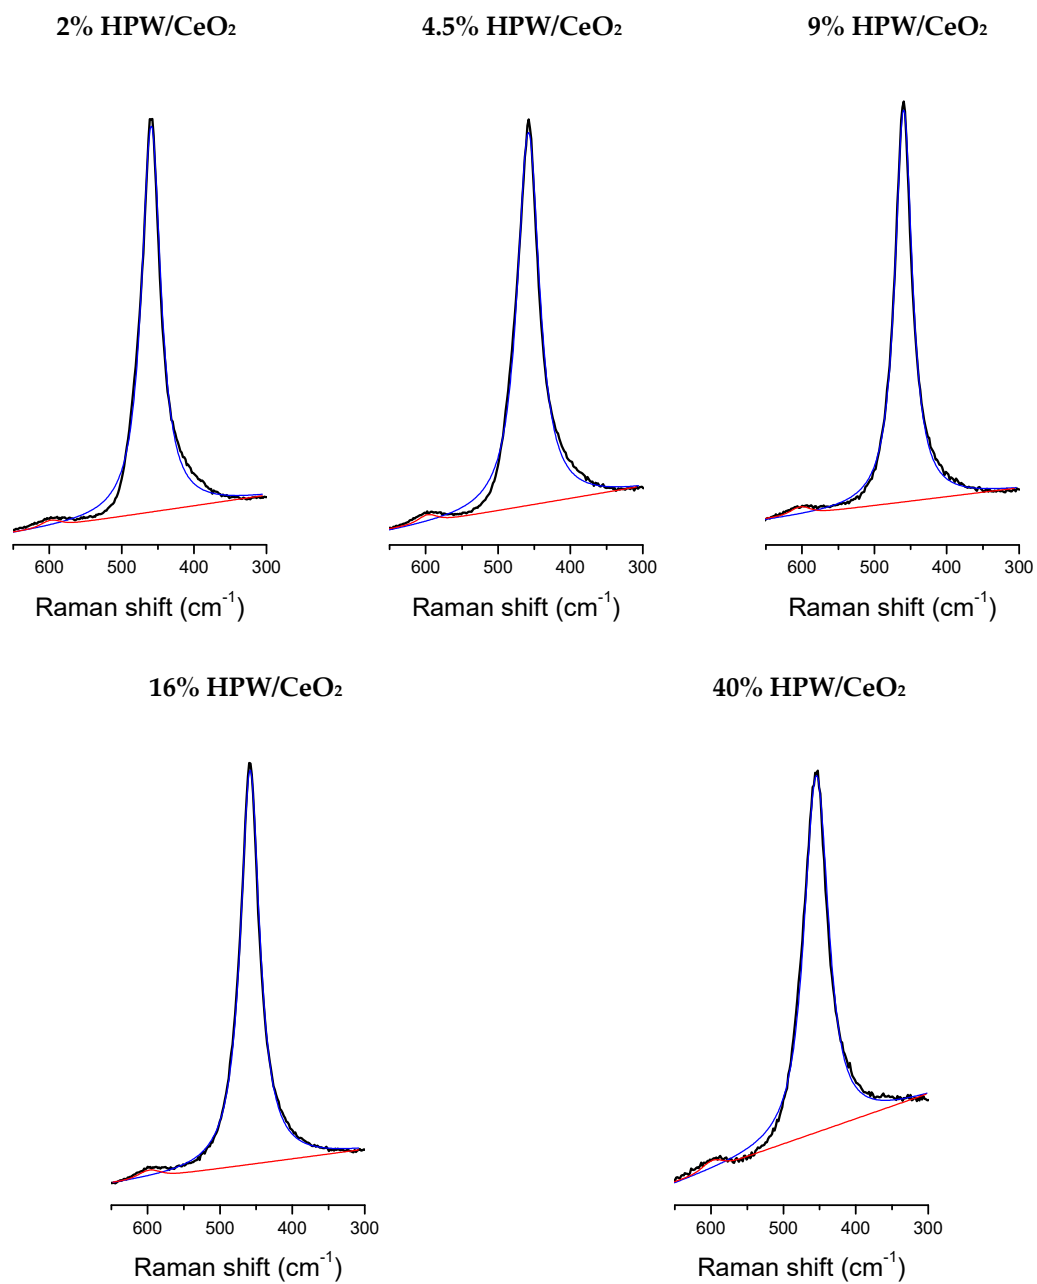

**Figure S4.** Deconvolutions of Raman spectra for each catalyst in the range 300-650  $\text{cm}^{-1}$

**Table S1.** Oxygen vacancies values of HPW/CeO<sub>2</sub> (2, 4.5, 9, 16 and 40 wt% W) catalysts.

| Catalysts                 | Oxygen vacancies<br>( $I_{ov}/I_{F_{2g}}$ ) |
|---------------------------|---------------------------------------------|
| 2% HPW/CeO <sub>2</sub>   | 0.016                                       |
| 4.5% HPW/CeO <sub>2</sub> | 0.022                                       |
| 9% HPW/CeO <sub>2</sub>   | 0.021                                       |
| 16% HPW/CeO <sub>2</sub>  | 0.018                                       |
| 40% HPW/CeO <sub>2</sub>  | 0.025                                       |

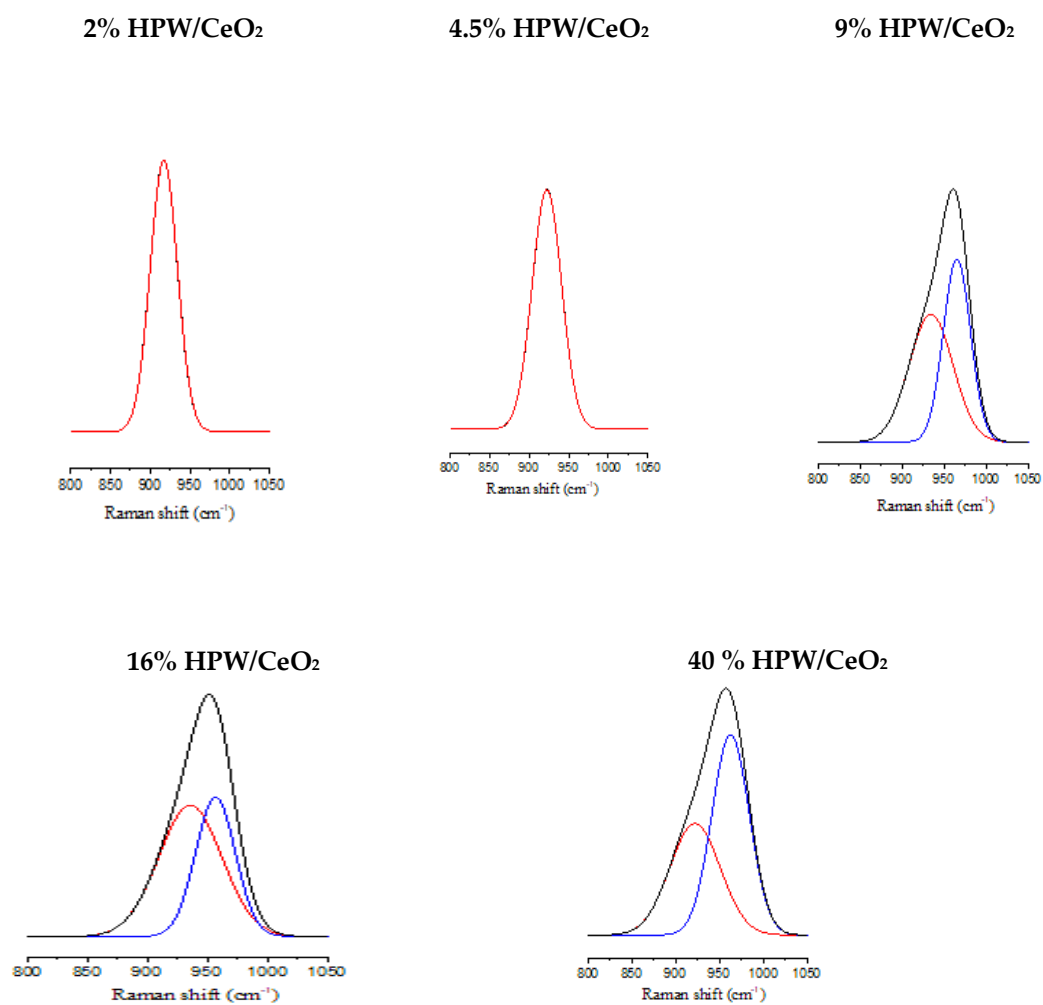

**Figure S5.** Deconvolutions of Raman spectra for each catalyst in the range 800-1050 cm<sup>-1</sup>

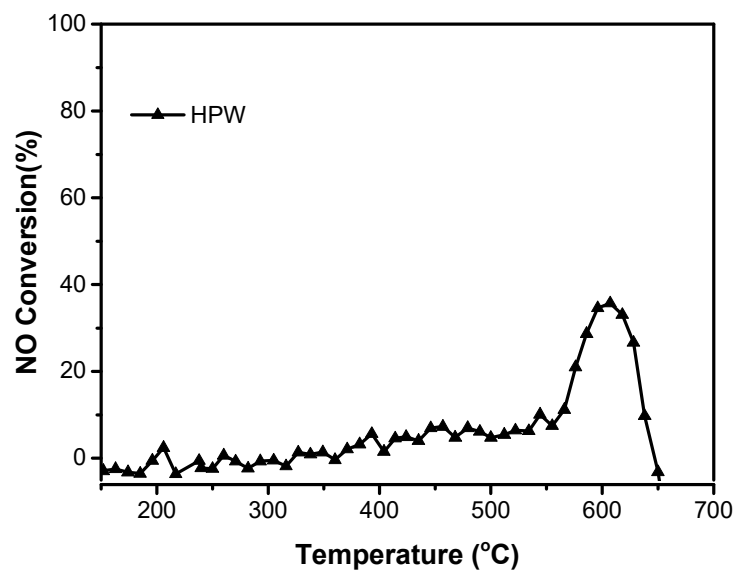

Figure S6: NO<sub>x</sub> conversion, over HPW as a function of temperature. Feed composition: 300 ppm NO, 350 ppm NH<sub>3</sub>, 5 vol. % H<sub>2</sub>O and 10 vol. % O<sub>2</sub> in He.

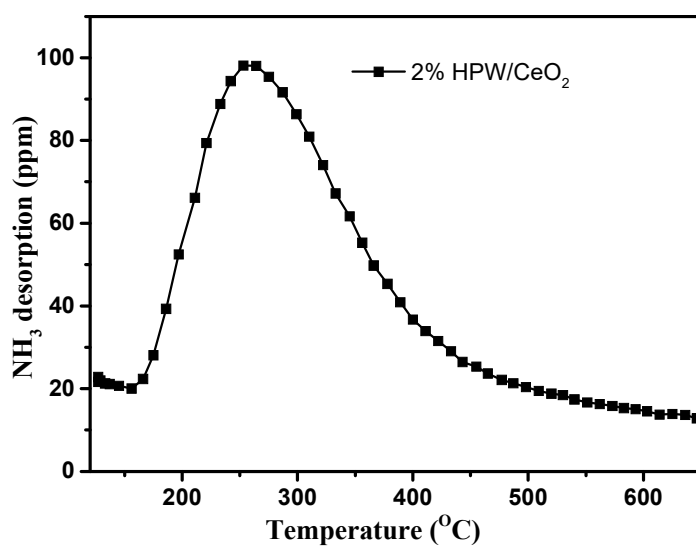

Figure S7. Determination of the acidity of the catalysts 2%HPW/CeO<sub>2</sub> by NH<sub>3</sub> desorption.

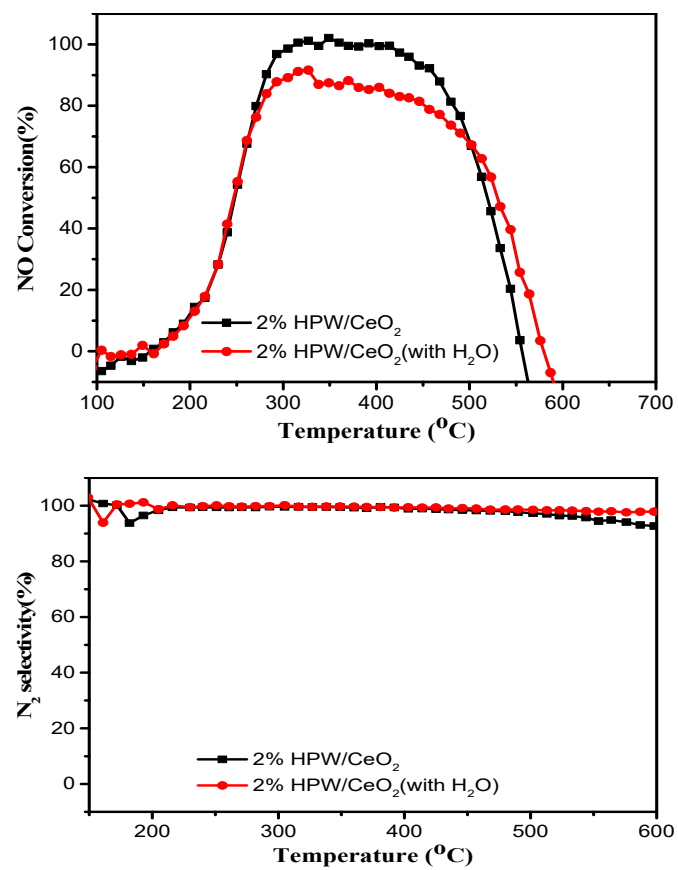

Figure S8. NO<sub>x</sub> conversion. N<sub>2</sub> selectivity over 2%HPW/CeO<sub>2</sub> as a function of temperature during several cycles. Feed composition: 300 ppm NO, 350 ppm NH<sub>3</sub>, 5 vol. % H<sub>2</sub>O and 10 vol. % O<sub>2</sub> in He.
